# Supplementary material for: Genomic Stability and Genetic Defense Systems in Dolosigranulum pigrum, a Candidate Beneficial Bacterium from the Human Microbiome
Source: PubMed Central journal article supplement (PMC8547433; doi:10.1128/msystems.00425-21), 2021-09-21

A

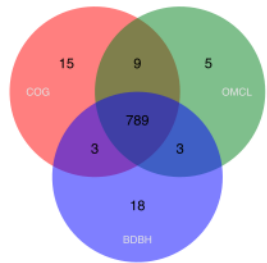

B

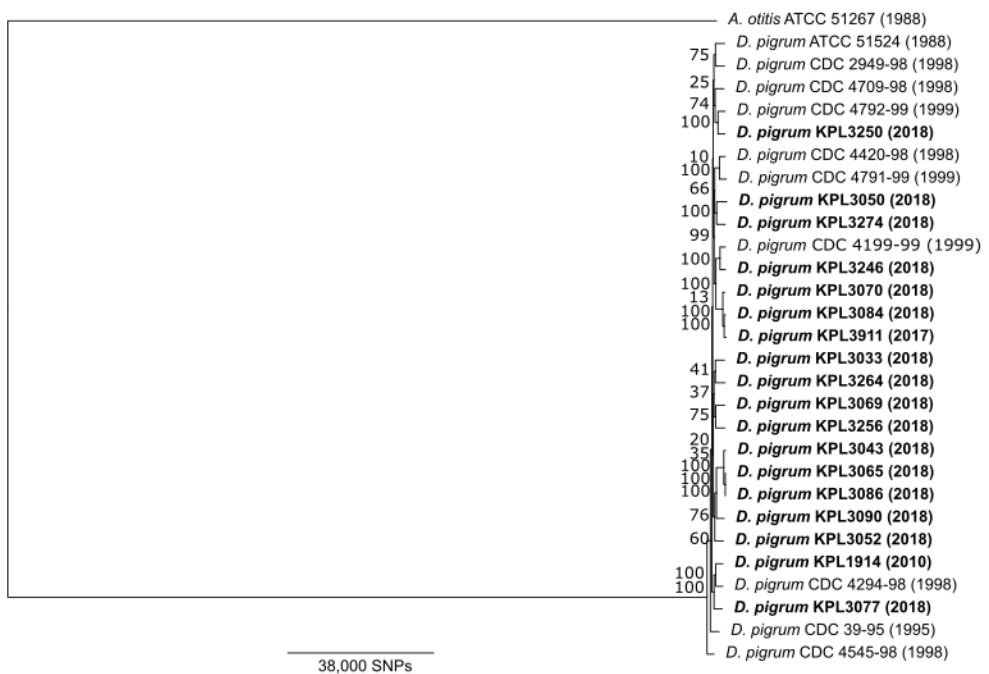

C

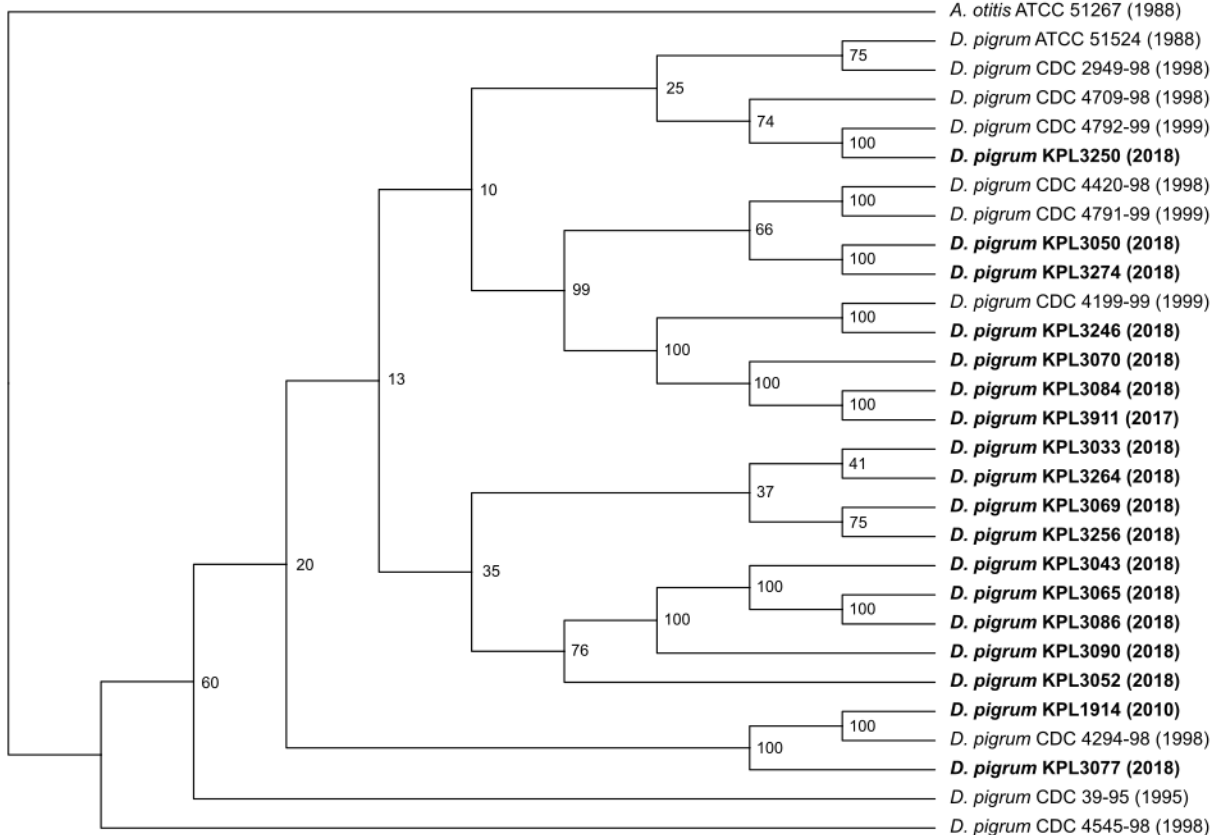

Supplement: msystems.00425-21-sf001.pdf [file msystems.00425-21-sf001.pdf]
