# Supplementary material for: Genomic Stability and Genetic Defense Systems in Dolosigranulum pigrum, a Candidate Beneficial Bacterium from the Human Microbiome
Source: PubMed Central journal article supplement (PMC8547433; doi:10.1128/msystems.00425-21), 2021-09-21

A

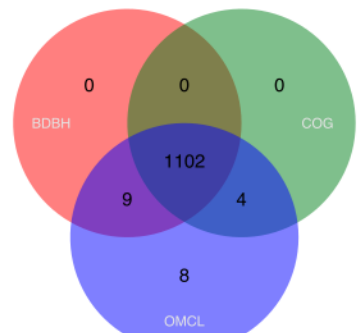

Color Key

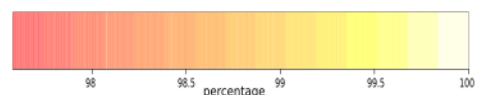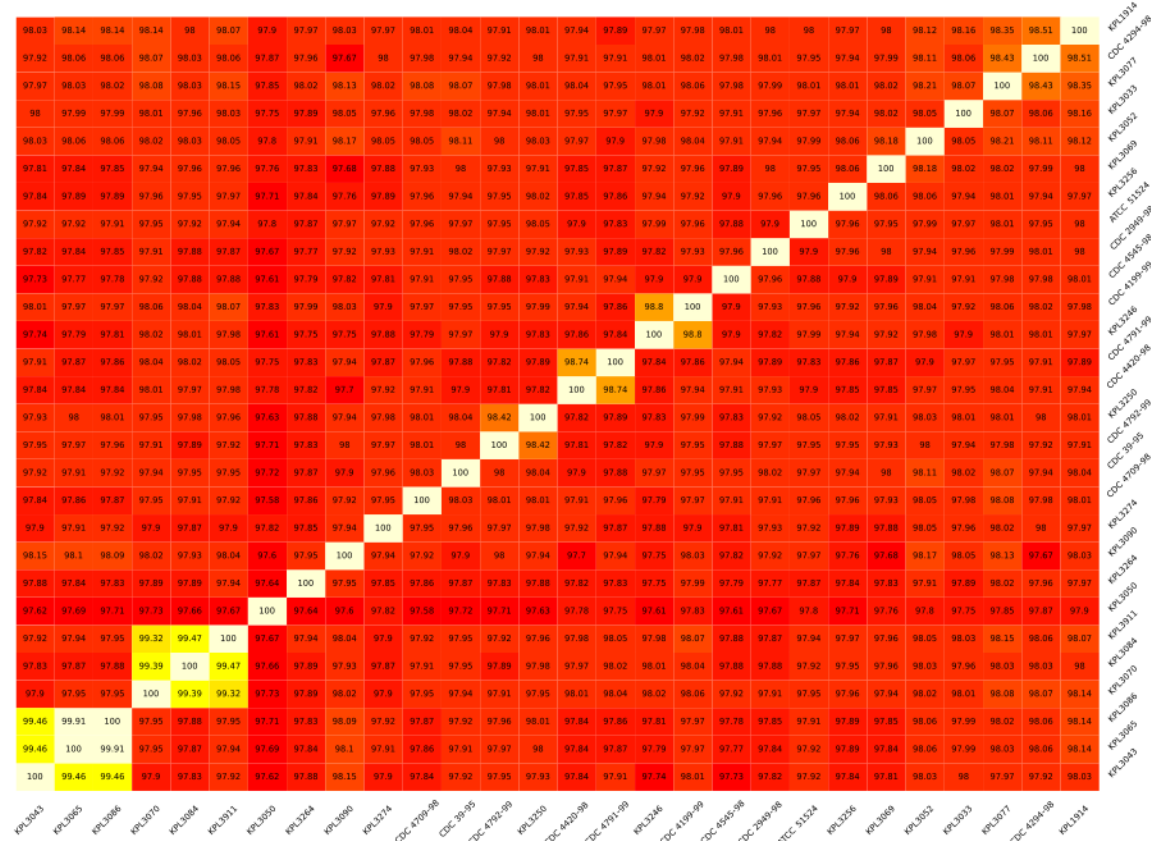

B

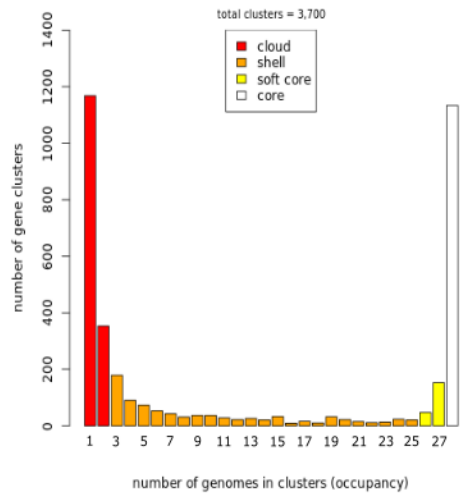

D

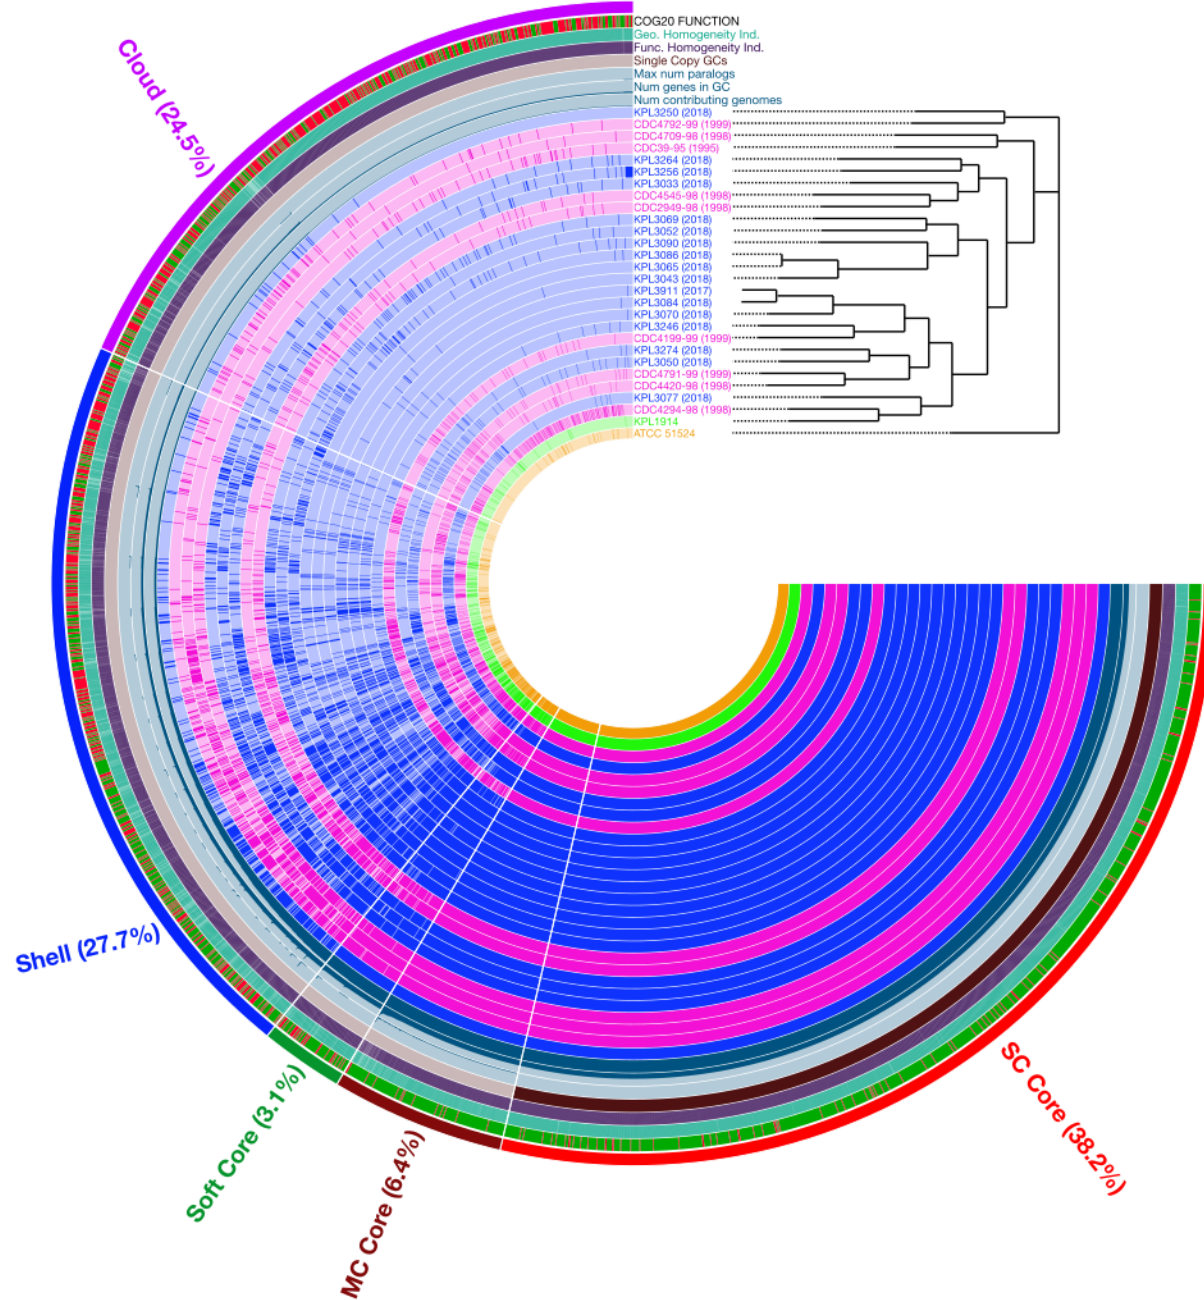

E

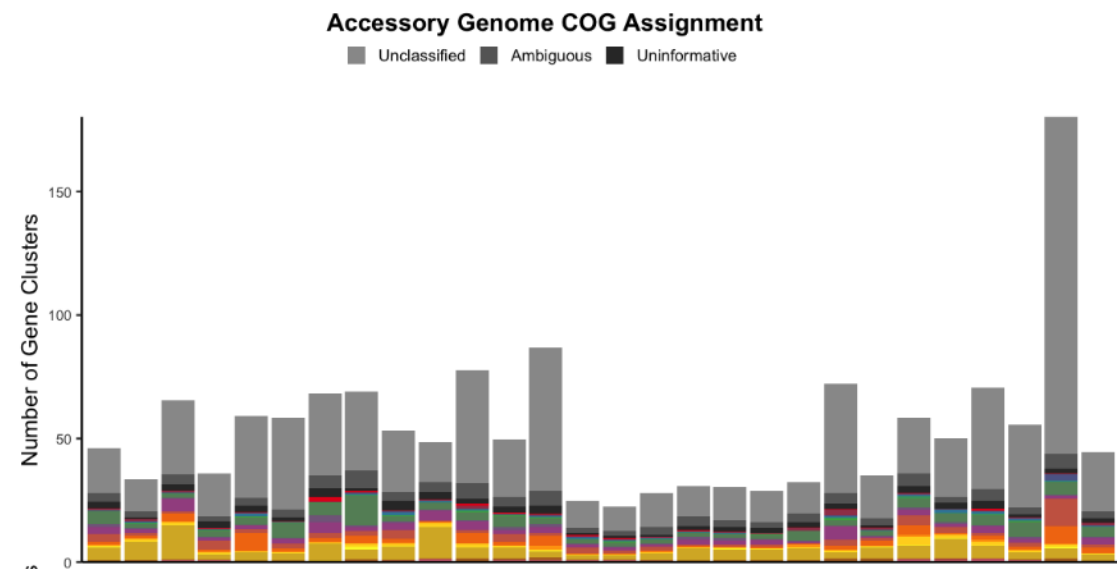

F

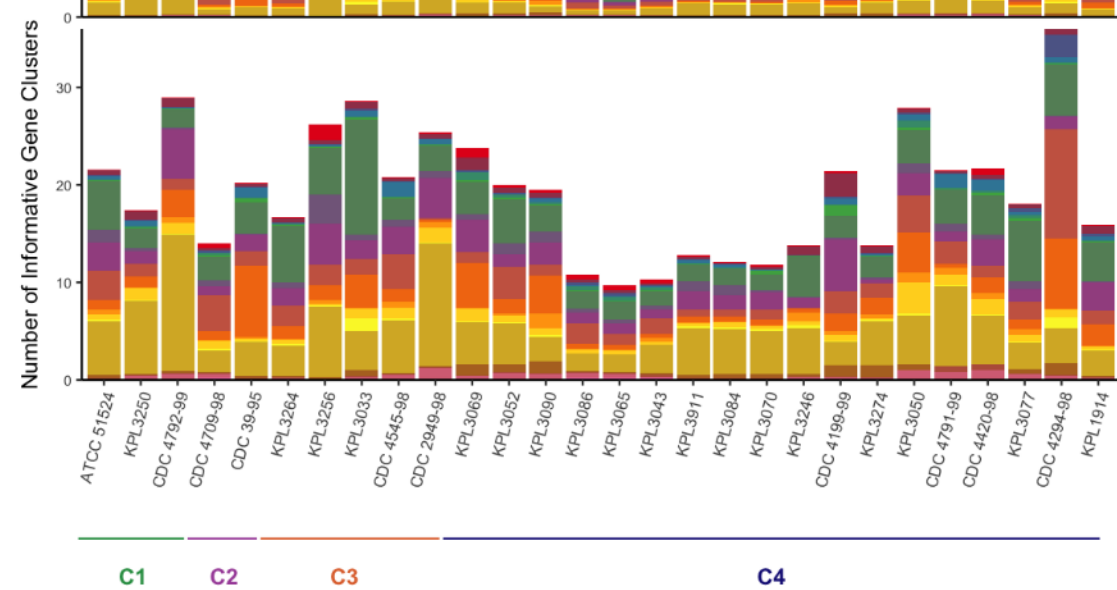

C1

C2

C3

C4

COG Categories

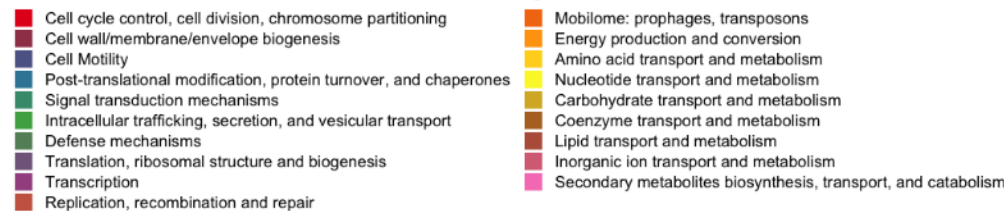

Supplement: msystems.00425-21-sf003.pdf [file msystems.00425-21-sf003.pdf]
