# Supplementary material for: Genomic Stability and Genetic Defense Systems in Dolosigranulum pigrum, a Candidate Beneficial Bacterium from the Human Microbiome
Source: PubMed Central journal article supplement (PMC8547433; doi:10.1128/msystems.00425-21), 2021-09-21

**A**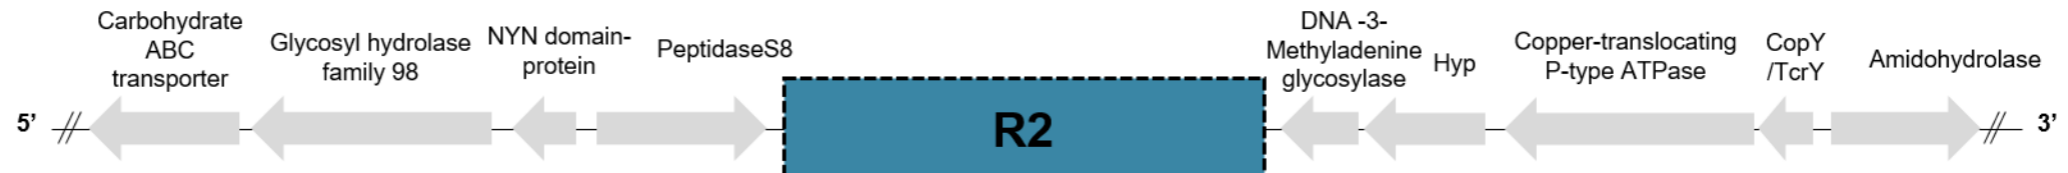

TYPE II

KPL3043 KPL3065  
KPL3256 KPL3090  
KPL3086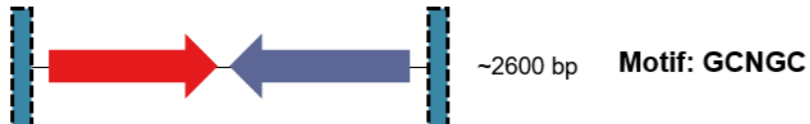KPL3911 KPL3084  
KPL3070 KPL3264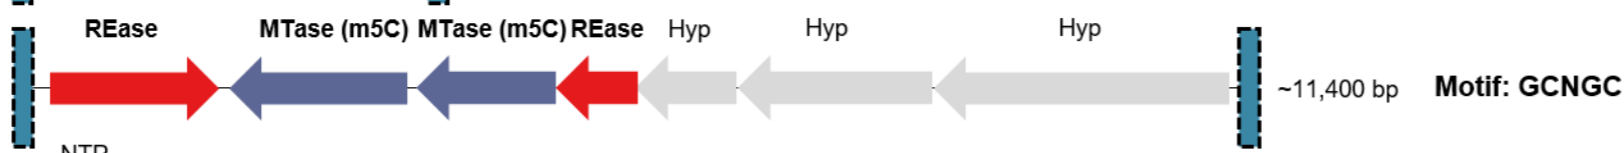

TYPE IV

KPL3274 KPL3033  
KPL3052 KPL3250  
KPL1934 KPL3246  
KPL3059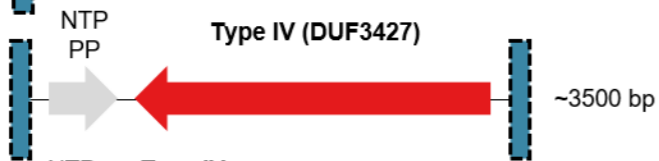

KPL3050

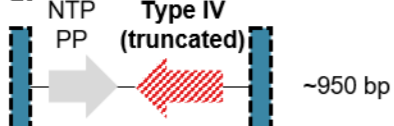KPL1914  
KPL3077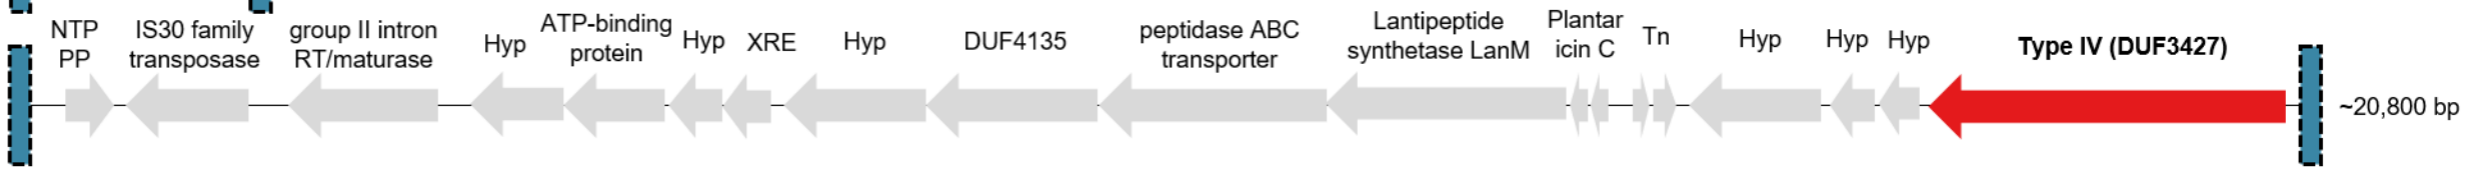**B**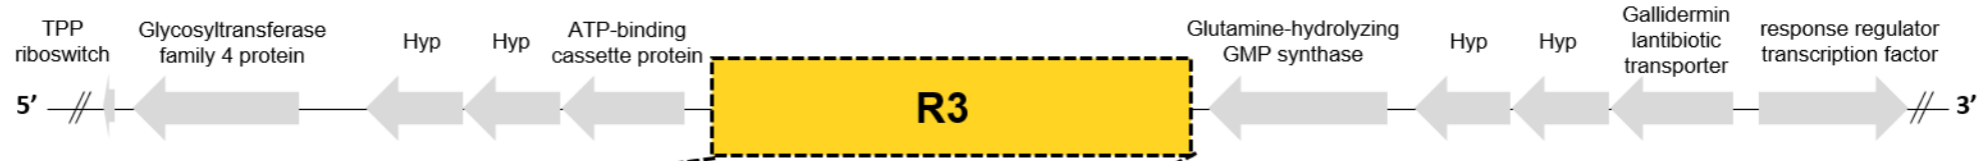

TYPE II

KPL3256

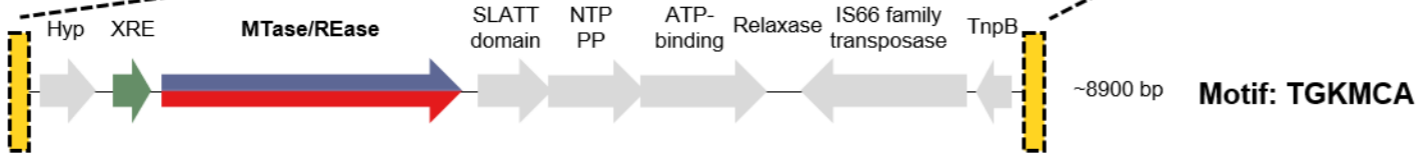KPL3911  
KPL3077  
KPL3084  
KPL3070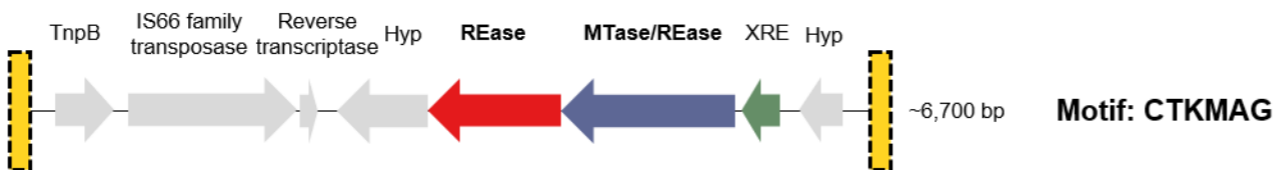

Supplement: msystems.00425-21-sf004.pdf [file msystems.00425-21-sf004.pdf]
