# Supplementary material for: Genomic Stability and Genetic Defense Systems in Dolosigranulum pigrum, a Candidate Beneficial Bacterium from the Human Microbiome
Source: PubMed Central journal article supplement (PMC8547433; doi:10.1128/msystems.00425-21), 2021-09-21
Supplement: msystems.00425-21-st001.pdf [file msystems.00425-21-st001.pdf]

**Table S1. Pangenome contribution of all 28 *D. pigrum* genomes<sup>a</sup>**

| Strain name    | Size (bp)      | GC%           | CDS         | tRNA      | rRNA      | tmRNA    | Core        | Soft core  | Shell      | Cloud     |
|----------------|----------------|---------------|-------------|-----------|-----------|----------|-------------|------------|------------|-----------|
| ATCC 51524     | 1,862,135      | 39.57%        | 1684        | 23        | 9         | 1        | 1134        | 195        | 245        | 42        |
| KPL1914        | 1,890,316      | 39.53%        | 1770        | 53        | 12        | 1        | 1134        | 197        | 293        | 52        |
| CDC 39-95      | 1,859,258      | 39.72%        | 1708        | 52        | 6         | 1        | 1134        | 192        | 250        | 68        |
| CDC 2949-98    | 1,886,398      | 39.57%        | 1693        | 53        | 6         | 1        | 1134        | 192        | 245        | 52        |
| CDC 4294-98    | 2,014,679      | 39.47%        | 1914        | 55        | 5         | 1        | 1134        | 190        | 310        | 211       |
| CDC 4420-98    | 1,934,436      | 39.65%        | 1776        | 55        | 4         | 1        | 1134        | 197        | 286        | 84        |
| CDC 4545-98    | 1,861,299      | 39.58%        | 1704        | 53        | 4         | 1        | 1134        | 181        | 245        | 74        |
| CDC 4709-98    | 1,987,788      | 39.68%        | 1778        | 54        | 12        | 2        | 1134        | 197        | 290        | 37        |
| CDC 4199-99    | 1,976,602      | 39.65%        | 1795        | 56        | 7         | 1        | 1134        | 165        | 311        | 105       |
| CDC 4791-99    | 1,873,869      | 39.60%        | 1692        | 54        | 5         | 1        | 1134        | 190        | 238        | 62        |
| CDC 4792-99    | 1,893,917      | 39.43%        | 1734        | 56        | 6         | 1        | 1134        | 194        | 248        | 87        |
| KPL3033        | 1,958,196      | 39.55%        | 1801        | 53        | 12        | 1        | 1134        | 196        | 321        | 72        |
| KPL3043        | 1,885,610      | 39.80%        | 1714        | 53        | 12        | 1        | 1134        | 194        | 274        | 21        |
| KPL3050        | 2,043,806      | 39.30%        | 1840        | 53        | 12        | 1        | 1134        | 193        | 339        | 72        |
| KPL3052        | 2,001,464      | 39.43%        | 1820        | 53        | 12        | 1        | 1134        | 194        | 342        | 68        |
| KPL3065        | 1,878,426      | 39.82%        | 1694        | 53        | 12        | 1        | 1134        | 197        | 278        | 13        |
| KPL3069        | 1,977,296      | 39.58%        | 1870        | 53        | 12        | 1        | 1134        | 177        | 347        | 123       |
| KPL3070        | 1,883,862      | 39.76%        | 1738        | 53        | 12        | 1        | 1134        | 192        | 292        | 36        |
| KPL3077        | 1,956,924      | 39.23%        | 1838        | 53        | 12        | 1        | 1134        | 194        | 352        | 67        |
| KPL3084        | 1,906,822      | 39.61%        | 1757        | 54        | 12        | 1        | 1134        | 193        | 302        | 36        |
| KPL3086        | 1,864,691      | 39.79%        | 1706        | 53        | 12        | 1        | 1134        | 192        | 278        | 31        |
| KPL3090        | 2,009,643      | 39.74%        | 1891        | 56        | 12        | 1        | 1134        | 193        | 310        | 127       |
| KPL3246        | 1,946,134      | 39.79%        | 1720        | 54        | 12        | 1        | 1134        | 192        | 276        | 44        |
| KPL3250        | 1,904,333      | 39.61%        | 1714        | 54        | 12        | 1        | 1134        | 196        | 263        | 44        |
| KPL3256        | 1,941,301      | 39.73%        | 1800        | 54        | 12        | 1        | 1134        | 193        | 307        | 65        |
| KPL3264        | 1,984,655      | 39.70%        | 1811        | 53        | 12        | 1        | 1134        | 186        | 323        | 86        |
| KPL3274        | 1,875,895      | 39.76%        | 1684        | 53        | 12        | 1        | 1134        | 188        | 239        | 51        |
| KPL3911        | 1,900,145      | 39.59%        | 1772        | 54        | 12        | 1        | 1134        | 193        | 304        | 44        |
| <b>AVERAGE</b> | <b>1927139</b> | <b>39.62%</b> | <b>1765</b> | <b>53</b> | <b>10</b> | <b>1</b> | <b>n.a.</b> | <b>191</b> | <b>290</b> | <b>67</b> |
| <b>MEDIAN</b>  | <b>1905578</b> | <b>39.61%</b> | <b>1764</b> | <b>53</b> | <b>12</b> | <b>1</b> | <b>n.a.</b> | <b>193</b> | <b>291</b> | <b>64</b> |

<sup>a</sup>With addition of new strain genomes, the average genome size increased from 1.86 Mb (median 1.88 Mb) (28) to 1.93 Mb (median 1.91 Mb), while the GC content remained at 39.6%. The CDS, tRNA, rRNA, and tmRNA are based on the Prokka::prodigal annotations. The average length of the CDS was 950 bp, while the average number of genes per kb was 0.916. There was also an increase in the number of predicted coding sequences from 1750 (median 1734) (28) to 1765 (median 1764). The predicted tRNA, rRNA, and tmRNA sequences averaged to 53, 10, and 1, respectively.
