# Supplementary material for: Genomic Stability and Genetic Defense Systems in Dolosigranulum pigrum, a Candidate Beneficial Bacterium from the Human Microbiome
Source: PubMed Central journal article supplement (PMC8547433; doi:10.1128/msystems.00425-21), 2021-09-21
Supplement: msystems.00425-21-st003.pdf [file msystems.00425-21-st003.pdf]

**Table S3. Predicted *D. pigrum* transposases, integrases and group II intron.**

| GENOMES            | TRANSPOSASES       |                    |                    |                    |                    |                    |                    |                    |              | INTEGRASES         |                    |                    |                    |                    | INTRON      |                    |
|--------------------|--------------------|--------------------|--------------------|--------------------|--------------------|--------------------|--------------------|--------------------|--------------|--------------------|--------------------|--------------------|--------------------|--------------------|-------------|--------------------|
|                    | <u>GC_00000003</u> | <u>GC_00000040</u> | <u>GC_00000055</u> | <u>GC_00001693</u> | <u>GC_00002092</u> | <u>GC_00002210</u> | <u>GC_00002310</u> | <u>GC_00002501</u> | Total        | <u>GC_00000028</u> | <u>GC_00000085</u> | <u>GC_00001701</u> | <u>GC_00001775</u> | <u>GC_00002348</u> | Total       | <u>GC_00000001</u> |
| ATCC_51524         | 3                  | 1                  | 1                  | 1                  |                    |                    |                    |                    | 6            |                    | 1                  |                    |                    |                    | 1           | 1                  |
| KPL1914            |                    |                    |                    |                    |                    |                    |                    |                    |              |                    | 1                  |                    | 1                  |                    | 2           | 2                  |
| KPL1922_CDC39_95   | 1                  |                    |                    |                    |                    |                    |                    |                    | 1            |                    |                    |                    |                    |                    | 1           | 1                  |
| KPL1930_CDC2949_98 |                    |                    |                    |                    |                    |                    |                    |                    |              | 1                  |                    |                    |                    |                    | 1           | 2                  |
| KPL1931_CDC4294_98 |                    |                    |                    |                    |                    |                    |                    | 1                  | 1            |                    |                    |                    |                    |                    |             | 2                  |
| KPL1932_CDC4420_98 | 2                  |                    |                    |                    |                    |                    |                    |                    | 2            |                    |                    | 1                  | 1                  |                    | 2           | 3                  |
| KPL1933_CDC4545_98 |                    | 1                  |                    | 1                  | 1                  | 1                  |                    |                    | 4            | 2                  |                    |                    |                    |                    | 2           | 1                  |
| KPL1934_CDC4709_98 | 6                  |                    |                    | 1                  |                    |                    |                    |                    | 7            |                    | 1                  | 1                  |                    |                    | 2           | 11                 |
| KPL1937_CDC4199_99 | 2                  | 1                  | 1                  |                    |                    |                    |                    |                    | 4            |                    |                    |                    |                    |                    |             | 2                  |
| KPL1938_CDC4791_99 | 1                  |                    |                    | 1                  |                    |                    |                    |                    | 2            |                    | 1                  |                    |                    |                    | 1           | 1                  |
| KPL1939_CDC4792_99 |                    | 1                  |                    |                    | 1                  | 1                  |                    |                    | 3            | 1                  |                    |                    |                    |                    | 1           | 2                  |
| KPL3033            | 1                  |                    |                    |                    |                    |                    |                    |                    | 1            |                    | 1                  |                    |                    |                    | 1           | 5                  |
| KPL3043            | 1                  |                    |                    |                    |                    |                    |                    |                    | 1            | 1                  |                    |                    |                    |                    | 1           | 9                  |
| KPL3050            | 4                  |                    |                    | 1                  |                    |                    |                    |                    | 5            | 2                  | 1                  | 3                  |                    |                    | 6           | 10                 |
| KPL3052            | 1                  |                    |                    |                    |                    |                    | 1                  |                    | 2            |                    | 1                  | 1                  |                    | 1                  | 3           | 4                  |
| KPL3065            | 1                  |                    |                    |                    |                    |                    |                    |                    | 1            | 1                  |                    |                    |                    |                    | 1           | 7                  |
| KPL3069            | 1                  |                    |                    |                    |                    |                    |                    |                    | 1            |                    |                    | 1                  |                    |                    | 2           | 2                  |
| KPL3070            | 5                  | 1                  | 1                  | 1                  |                    |                    |                    |                    | 8            |                    | 1                  |                    |                    |                    | 1           | 5                  |
| KPL3077            | 11                 | 1                  | 1                  |                    |                    |                    |                    |                    | 13           | 1                  |                    |                    | 1                  |                    | 2           | 2                  |
| KPL3084            | 7                  | 2                  | 2                  | 1                  |                    |                    |                    |                    | 12           |                    | 1                  |                    |                    |                    | 1           | 6                  |
| KPL3086            | 1                  |                    |                    |                    |                    |                    |                    |                    | 1            |                    |                    |                    |                    |                    |             | 6                  |
| KPL3090            | 6                  |                    |                    | 1                  |                    |                    |                    |                    | 7            | 1                  | 1                  | 1                  |                    |                    | 3           | 14                 |
| KPL3246            | 3                  |                    |                    |                    |                    |                    |                    |                    | 3            |                    |                    |                    |                    |                    |             | 8                  |
| KPL3250            | 2                  | 1                  |                    |                    | 1                  | 1                  |                    |                    | 5            | 1                  | 1                  |                    |                    |                    | 2           | 9                  |
| KPL3256            | 1                  | 1                  | 1                  | 1                  |                    |                    |                    |                    | 4            |                    |                    |                    |                    |                    |             | 3                  |
| KPL3264            | 6                  |                    |                    | 1                  |                    |                    |                    |                    | 7            |                    | 1                  |                    |                    |                    | 1           | 5                  |
| KPL3274            |                    |                    |                    |                    |                    |                    | 1                  |                    | 1            | 5                  |                    |                    |                    | 1                  | 6           | 1                  |
| KPL3911            | 8                  | 2                  | 2                  | 1                  |                    |                    |                    |                    | 13           |                    | 1                  |                    |                    |                    | 1           | 8                  |
| <b>Total</b>       | <b>74</b>          | <b>12</b>          | <b>9</b>           | <b>11</b>          | <b>3</b>           | <b>3</b>           | <b>2</b>           | <b>1</b>           | <b>115</b>   | <b>17</b>          | <b>13</b>          | <b>8</b>           | <b>3</b>           | <b>2</b>           | <b>43</b>   | <b>132</b>         |
| <b>Mean</b>        | <b>3.36</b>        | <b>1.2</b>         | <b>1.29</b>        | <b>1</b>           | <b>1</b>           | <b>1</b>           | <b>1</b>           | <b>1</b>           | <b>4.42</b>  | <b>1.55</b>        | <b>1</b>           | <b>1.33</b>        | <b>1</b>           | <b>1</b>           | <b>1.95</b> | <b>4.71</b>        |
| <b>Median</b>      | <b>2</b>           | <b>1</b>           | <b>1</b>           | <b>1</b>           | <b>1</b>           | <b>1</b>           | <b>1</b>           | <b>1</b>           | <b>3.5</b>   | <b>1</b>           | <b>1</b>           | <b>1</b>           | <b>1</b>           | <b>1</b>           | <b>1.5</b>  | <b>3.5</b>         |
| <b>Variance</b>    | <b>8.24</b>        | <b>0.18</b>        | <b>0.24</b>        | <b>0</b>           | <b>0</b>           | <b>0</b>           | <b>0</b>           | <b>0</b>           | <b>14.25</b> | <b>1.47</b>        | <b>0</b>           | <b>0.67</b>        | <b>0</b>           | <b>0</b>           | <b>2.14</b> | <b>12.9</b>        |
| <b>SD</b>          | <b>2.87</b>        | <b>0.42</b>        | <b>0.49</b>        | <b>0</b>           | <b>0</b>           | <b>0</b>           | <b>0</b>           | <b>0</b>           | <b>3.78</b>  | <b>1.21</b>        | <b>0</b>           | <b>0.82</b>        | <b>0</b>           | <b>0</b>           | <b>1.46</b> | <b>3.59</b>        |
| <b>MAD</b>         | <b>1.48</b>        | <b>0</b>           | <b>0</b>           | <b>0</b>           | <b>0</b>           | <b>0</b>           | <b>0</b>           | <b>0</b>           | <b>3.71</b>  | <b>0</b>           | <b>0</b>           | <b>0</b>           | <b>0</b>           | <b>0</b>           | <b>0.74</b> | <b>3.71</b>        |
| <b>Min</b>         | <b>1</b>           | <b>1</b>           | <b>1</b>           | <b>1</b>           | <b>1</b>           | <b>1</b>           | <b>1</b>           | <b>1</b>           | <b>1</b>     | <b>1</b>           | <b>1</b>           | <b>1</b>           | <b>1</b>           | <b>1</b>           | <b>1</b>    | <b>1</b>           |
| <b>Max</b>         | <b>11</b>          | <b>2</b>           | <b>2</b>           | <b>1</b>           | <b>1</b>           | <b>1</b>           | <b>1</b>           | <b>1</b>           | <b>13</b>    | <b>5</b>           | <b>1</b>           | <b>3</b>           | <b>1</b>           | <b>1</b>           | <b>6</b>    | <b>14</b>          |
